# Supplementary figures and images for: Histopathology and selective biomarker expression in human meibomian glands
Source: PubMed Central journal article supplement — Br J Ophthalmol. 2019 Oct 4;104(7):999–1004. doi: 10.1136/bjophthalmol-2019-314466 (PMC7361036; doi:10.1136/bjophthalmol-2019-314466), 2019-10-04

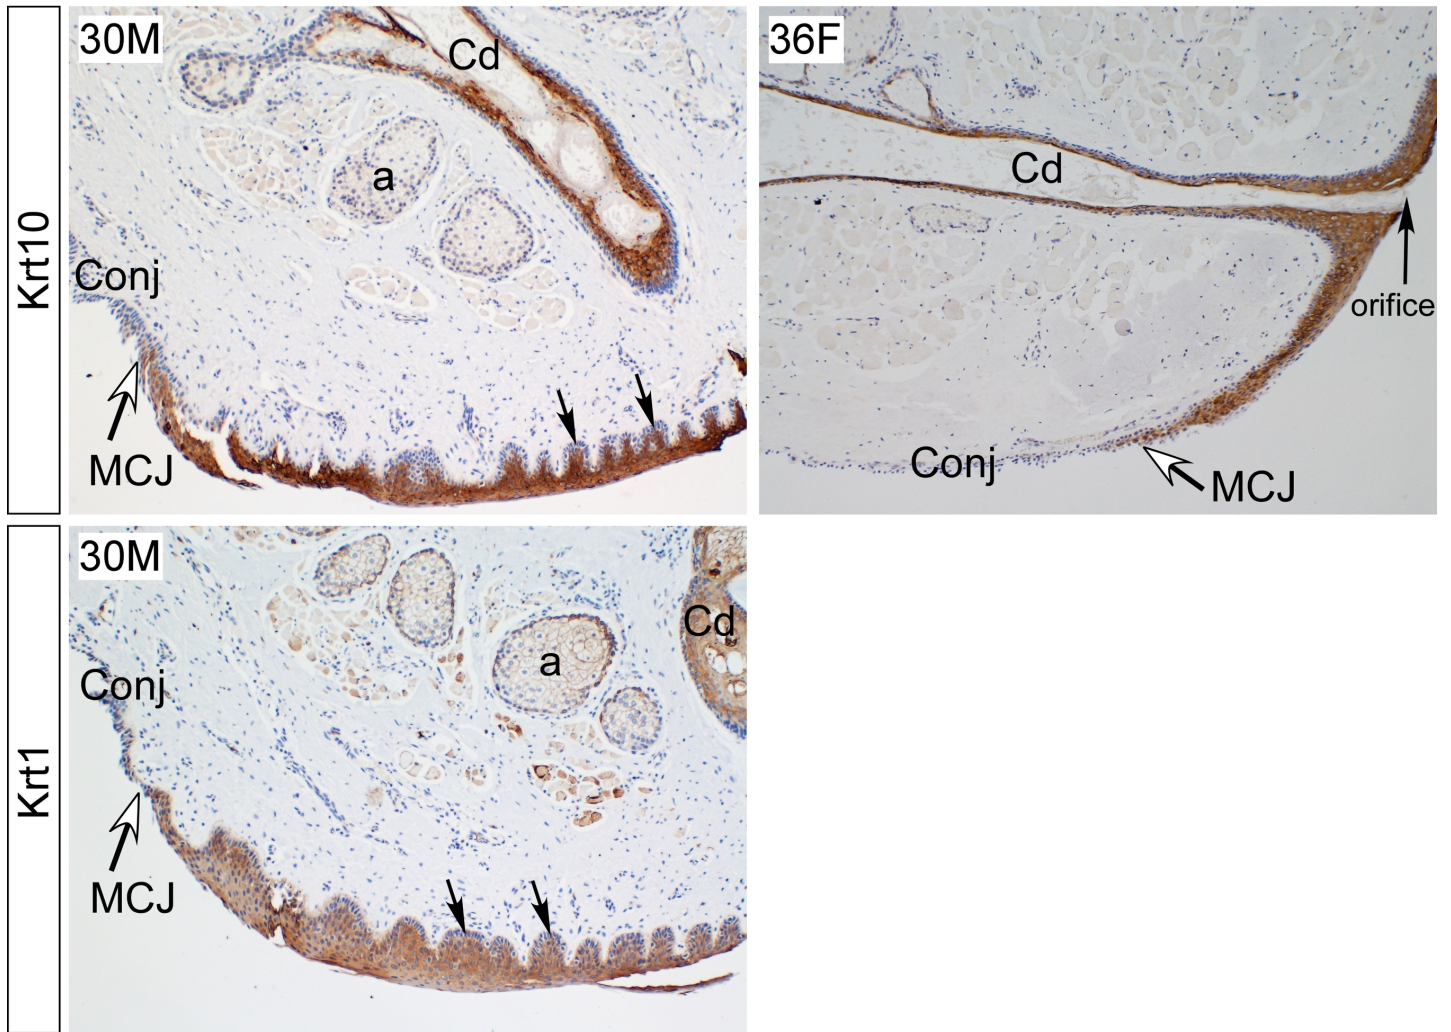

Supplement: bjophthalmol-2019-314466supp001.pdf [file bjophthalmol-2019-314466supp001.pdf]
